# Supplementary material for: Systemic Mobilization of Breast Cancer Resistance Protein in Response to Oncogenic Stress
Source: MDPI journal article supplement (doi:10.3390/cancers14020313), 2022-01-09
Supplement: s1 [file s1]

# Supplementary Materials: Systemic Mobilization of Breast Cancer Resistance Protein in Response to Oncogenic Stress

Małgorzata Szczygieł , Marcin Markiewicz, Milena Julia Szafraniec, Agnieszka Hojda, Leszek Fiedor and Krystyna Urbanska

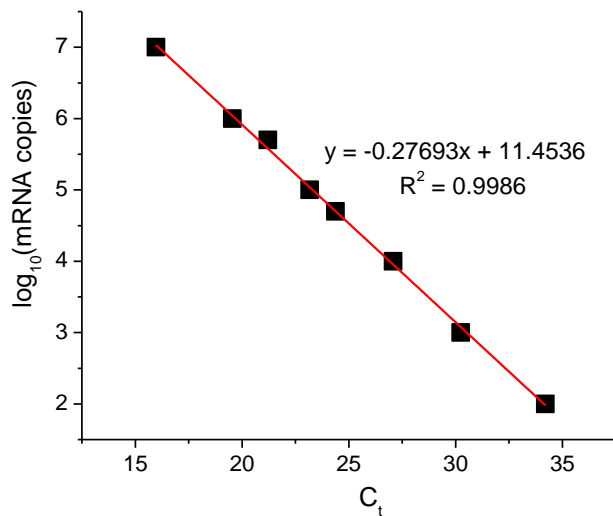

**Figure S1.** A calibration curve for mRNA quantification. Several dilutions of a synthetic oligonucleotide complementary to the Taq-man probe were used to generate the curve. The resulting  $C_t$  values are plotted as a function of the decimal logarithm of the template amounts and a linear trend is fit to the data.
